# Supplementary material
Source: PubMed Central journal article supplement (PMC2923906)
Supplement: pp.110.156976_1.pdf [file pp.110.156976_1.pdf]

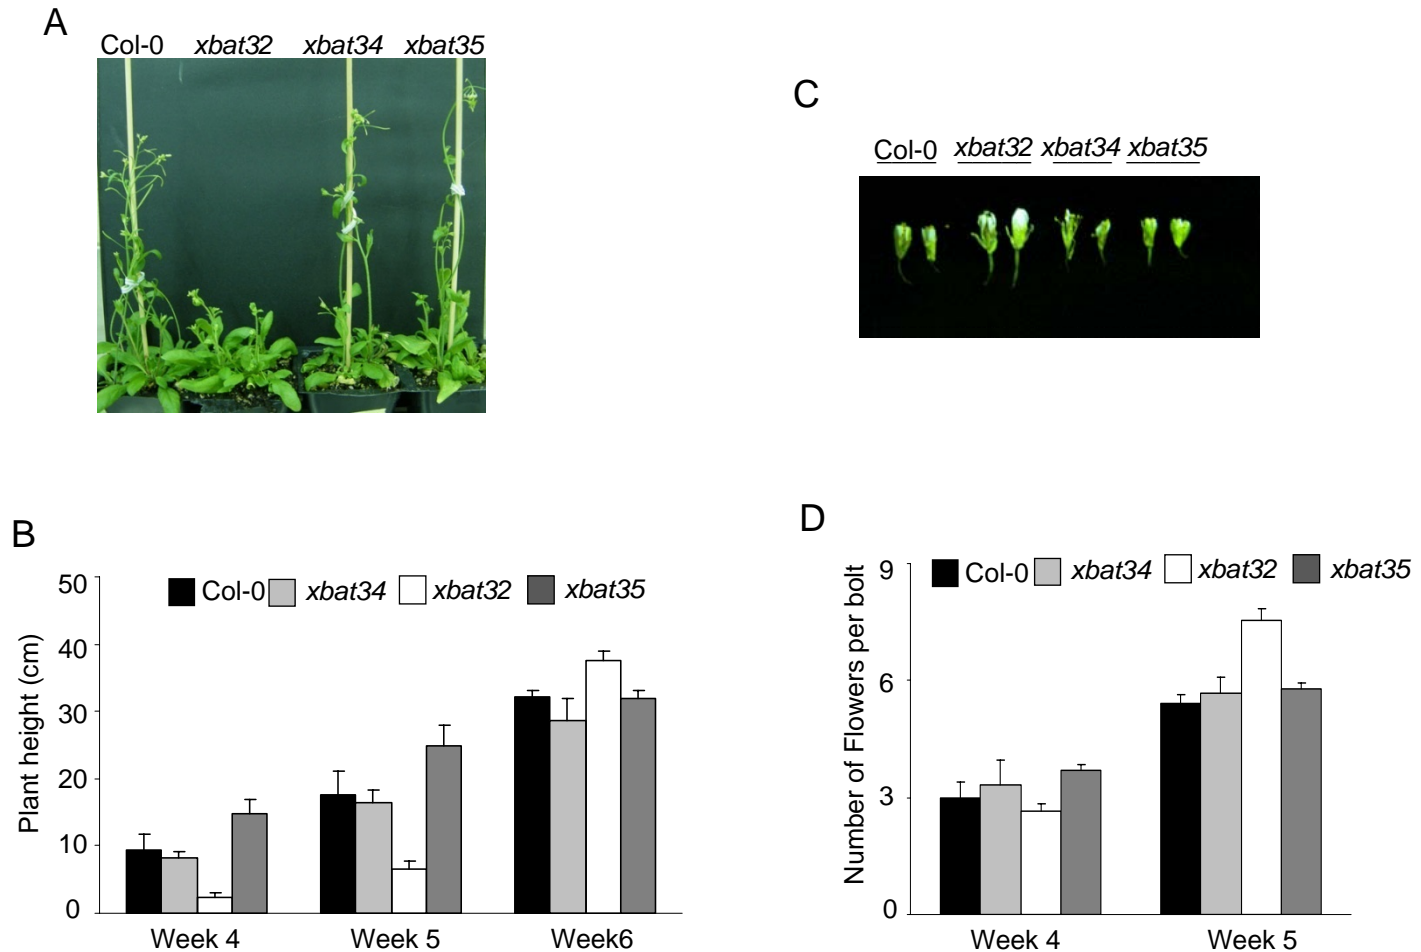

**Supplemental Figure 1.** Phenotypic Analysis of *XBAT* Mutants. A, Four-week-old Col-0 and *xbat* plants. B, Graph showing plant height of Col-0, *xbat32*, *xbat34* and *xbat35* at weeks 4, 5 and 6. C, Flowers from five-week-old Col-0, *xbat32*, *xbat34* and *xbat35* plants. D, Graph showing the number of flowers per bolt for five-week-old Col-0, *xbat32*, *xbat34* and *xbat35* plants.

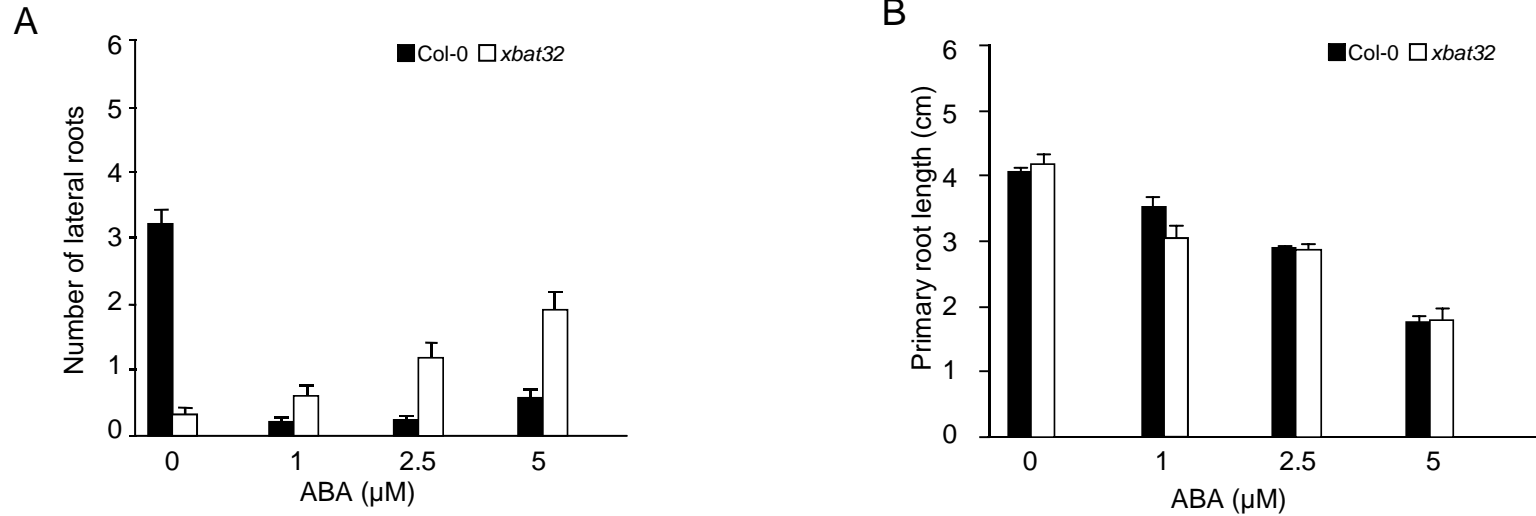

**Supplemental Figure 2.** Comparison of wild type Col-0 and *xbat32* response to ABA. A and B, Seedlings were grown for three days on GM and then transferred to GM supplemented with the indicated concentration of ABA. After an additional five days of growth lateral root number (A) and primary root length (B) was quantified. Each bar represents the average number of lateral roots or primary root length  $\pm$  SE.

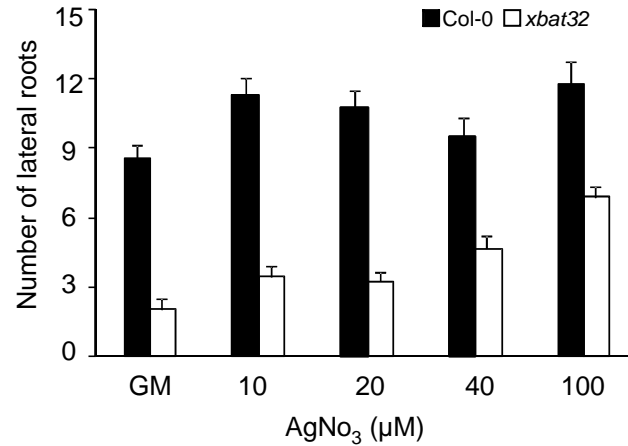

**Supplemental Figure 3.** Inhibition of ethylene signaling in *xbat32*. Col-0 and *xbat32* seedlings were initially grown on GM for three days and then treated with indicated concentrations of AgNO<sub>3</sub>. The number of lateral roots was quantified after an additional five days of growth. Each bar represents the average number of lateral roots  $\pm$  SE.
